# Supplementary material
Source: publisher figshare collection journal article supplement (https://acs.figshare.com/ndownloader/files/4158220)

## SUPPLEMENTARY INFORMATION

### Alternative method for cloning, production and purification of recombinant protein

The gene encoding SaCsn75A, excluding the part coding for a putative 26-residue signal peptide, was amplified from *Streptomyces avermitilis* genomic DNA by polymerase chain reactions with the following primers (synthesized at Eurofins MWG Operon, Germany): SaCsn75A-F 5' CGAAGATCTTCCCCGTCCGGCACCAAGGC 3' and primer SaCsn75A-R 5' CAGAAGCTTTCAGTTGTTCTGGAGGAAGTGC 3'. A BglII and a HindIII site were incorporated at the start and the end of the gene, respectively, to enable construction of an in-frame N-terminal His tag-fused construct in the pBAD/HisB(s) vector. This vector is a variant of the commercial vector pBAD/HisB (Invitrogen, USA) with a shortened region between the N-terminal polyhistidine tail and the down-stream multiple cloning site. In the final construct, the expression of the gene is under the transcriptional control of the arabinose-regulated araBAD promoter. The gene product consists of the sequence MAHHHHHHHRS followed by the mature SaCsn75A. The resulting plasmids were transformed into *E. coli* TOP 10 cells (Invitrogen). DNA sequencing was performed using a BigDye<sup>®</sup> Terminator v3.1 Cycle Sequencing Kit (Perkin Elmer / Applied Biosystems, Foster City, CA, USA) and an ABI PRISM<sup>®</sup> 3100 Genetic Analyser (Perkin Elmer / Applied Biosystems).

For protein expression, the transformant was grown at 37°C in 2×TY medium containing 100 mg of ampicillin per liter until the OD<sub>600</sub> reached 0.5, after which gene expression was induced by adding 0.02% (w/v; final concentration) arabinose. After 40 hours incubation at 18°C, cells were harvested by centrifugation and the protein was purified to homogeneity by Ni<sup>2+</sup> affinity column chromatography using a Ni-NTA Superflow Column (Qiagen, Venlo,

Netherlands), and purity was confirmed by SDS-PAGE. 2 mM CaCl<sub>2</sub> and 10% Glycerol were added to all the buffers for protein purification. Protein concentrations were determined using the Bio-Rad Protein Assay (Bio-Rad, USA), with bovine serum albumin as a standard. The protein yield was about 2 mg of pure SaCsn75A per litre of culture of *E. coli*. The protein was stored at -20°C in 20 mM Tris pH 8.0, 20 mM NaCl, 2 mM CaCl<sub>2</sub>, and 50% Glycerol.

### Supporting information

**Figure SI 1. <sup>1</sup>H-NMR spectra (anomer region) of selected CHOS fractions (DP3, 5 and 6) obtained after extensive degradation ( $\alpha = 0.21$ ) of a  $F_A = 0.52$  chitosan.** Spectra were acquired at 300 MHz, 90 °C and pD 4.2. The reducing end of the  $\alpha$ -anomer of an **A**-unit resonates at 5.19 ppm, while the  $\beta$ -anomer of a **A**-unit resonates at 4.742 ppm when the neighboring residue is **D** (present in the spectrum) or at 4.705 ppm if the neighboring residue is an **A** (not present in the spectrum). The  $\alpha$ -anomer of a **D**-unit resonates at 5.46 ppm and the  $\beta$ -anomer at 4.97 ppm. The reducing end resonance of **D** ( $\beta$ -anomer) is only partially resolved from the resonance of the internal **D**-units (4.85 - 4.97 ppm)<sup>16, 34</sup>. Internal **A**-units resonate at 4.55 – 4.68 ppm.

**Figure SI 1**

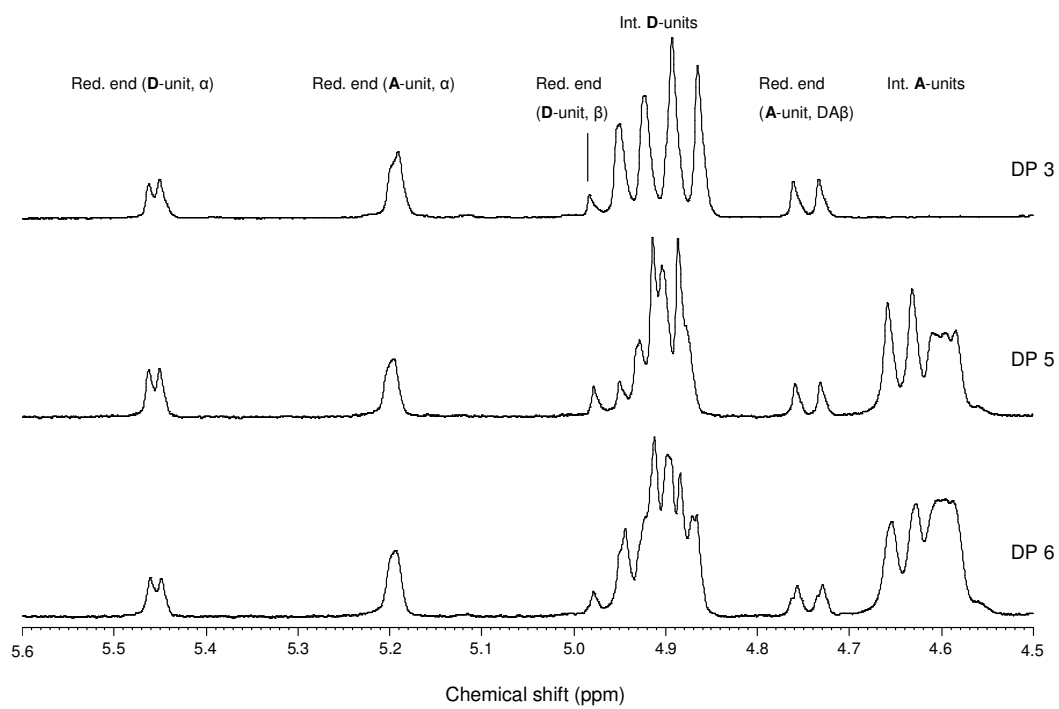

Supplement: Supplementary file 1 [file 4158220]
